# Supplementary material
Source: Springer Nature journal article supplement (https://www.springermedizin.de/resource/supplementary/12936_2012_2491_MOESM16_ESM.pdf/9542830)

**A****FITC- $\Delta$ Fd**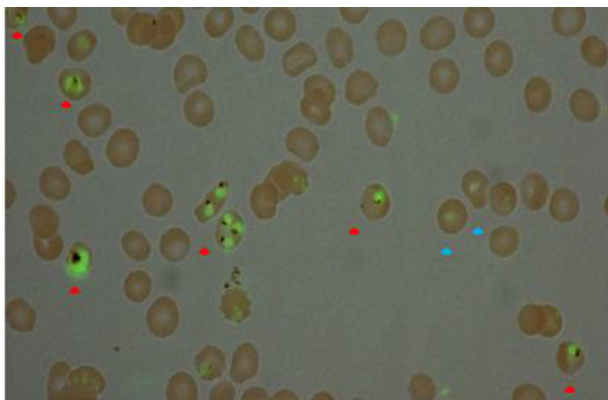**B**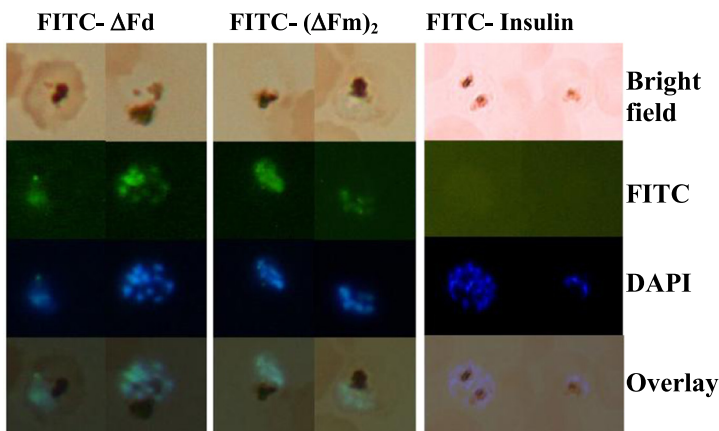**C**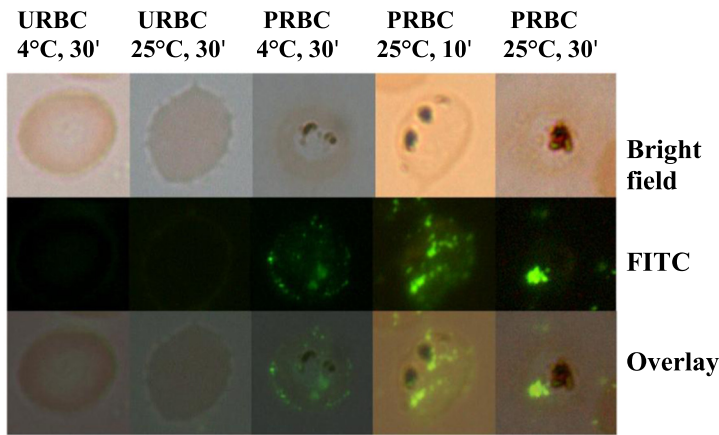

Supplement: MOESM16 [file 9542830]
